# Supplementary material
Source: Springer Nature journal article supplement (https://www.springermedizin.de/resource/supplementary/12889_2011_3408_MOESM1_ESM.pdf/9488982)
Supplement: MOESM1 [file 9488982]

*MetS/pre-MetS*

| Category | %     | <i>n</i> |
|----------|-------|----------|
| 0        | 58.8  | 284      |
| 1        | 41.2  | 199      |
| Total    | 100.0 | 483      |

MVPA

Improvement=0.031

 $\leq 26.5$  METs·h/week $P < 0.001$  $> 26.5$  METs·h/week

| Category | %    | <i>n</i> |
|----------|------|----------|
| 0        | 49.0 | 146      |
| 1        | 51.0 | 152      |
| Total    | 61.7 | 298      |

| Category | %    | <i>n</i> |
|----------|------|----------|
| 0        | 74.6 | 138      |
| 1        | 25.4 | 47       |
| Total    | 38.3 | 185      |

Age

Improvement=0.018

Age

Improvement=0.005

 $\leq 51.5$  years $P < 0.001$  $> 51.5$  years

| Category | %    | <i>n</i> |
|----------|------|----------|
| 0        | 58.2 | 110      |
| 1        | 41.8 | 79       |
| Total    | 39.1 | 189      |

| Category | %    | <i>n</i> |
|----------|------|----------|
| 0        | 33.0 | 36       |
| 1        | 67.0 | 73       |
| Total    | 22.6 | 109      |

 $\leq 44.5$  years $P < 0.001$  $> 44.5$  years

| Category | %    | <i>n</i> |
|----------|------|----------|
| 0        | 85.5 | 59       |
| 1        | 14.5 | 10       |
| Total    | 14.3 | 69       |

| Category | %    | <i>n</i> |
|----------|------|----------|
| 0        | 68.1 | 79       |
| 1        | 31.9 | 37       |
| Total    | 24.0 | 116      |

Sex

Improvement=0.020

 $P < 0.05$ 

Women

Men

| Category | %    | <i>n</i> |
|----------|------|----------|
| 0        | 72.4 | 76       |
| 1        | 27.6 | 29       |
| Total    | 21.7 | 105      |

| Category | %    | <i>n</i> |
|----------|------|----------|
| 0        | 40.5 | 34       |
| 1        | 59.5 | 50       |
| Total    | 17.4 | 84       |
